# Supplementary material
Source: PubMed Central journal article supplement (PMC3079167)
Supplement: Supp_Data.pdf [file Supp_Data.pdf]

## Supplementary Data

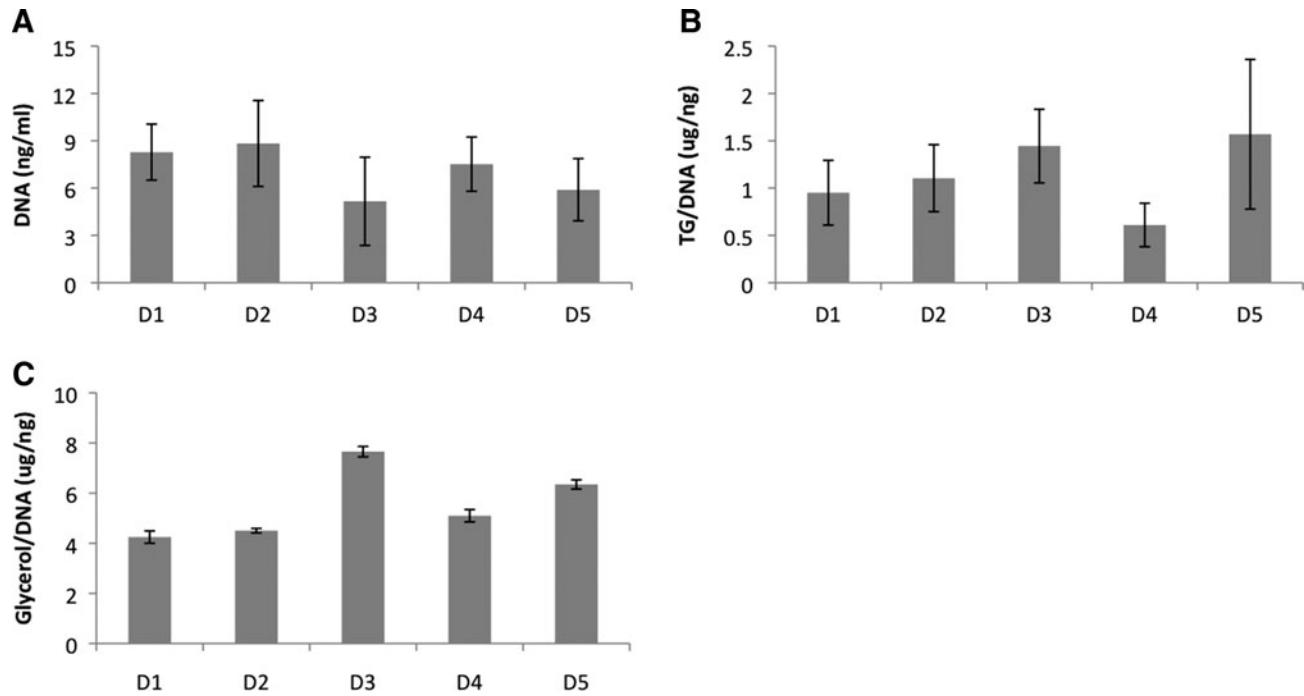

**SUPPLEMENTARY FIG. S1.** Donor-to-donor variability of adipogenic differentiation potential of hASCs was evaluated with five random female donors (D1–D5), with no evidence of diabetes or metabolic syndrome. DNA content (A), intracellular triglyceride (B), and secreted glycerol (C) were measured following 2 weeks of culture on three-dimensional aqueous silk fibroin scaffolds. No significant differences between donors were observed.
